# Supplementary material
Source: HighWire-hosted journal article supplement (https://www.cmaj.ca/highwire/filestream/146523/field_highwire_adjunct_files/0/211933-image-1-at.pdf)
Supplement: 211933-image-1-at.pdf [file 211933-image-1-at.pdf]

## Appendix 1

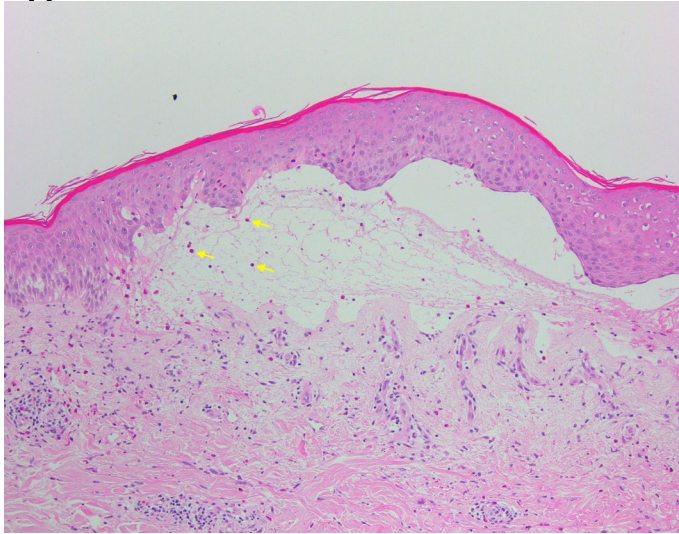

**Appendix 1.** Skin biopsy showing subepidermal blister formation with eosinophils (arrows) within cleft.
